## PERSPECTIVAS

### EDITORIALES

- 1 TDAH y obesidad**  
*J.J. Sandra Kooij, M.D., Ph.D.*
- 3 Activación microglial y el inicio de la psicosis**  
*Tyrone D. Cannon, Ph.D.*
- 5 Avanzando hacia la medicina individualizada en el tratamiento de la psicosis**  
*Adrienne C. Lahti, M.D.*
- 8 ¿Se acuerda de los buenos tiempos? Memoria autobiográfica sesgada en la depresión**  
*Amit Etkin, M.D., Ph.D.*

### INTROSPECCIÓN

- 10 Detrás de las cerraduras de seguridad**  
*Eduardo Constantino, M.D.*

### CONFERENCIA DE CASO CLÍNICO

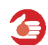

- 12 Una mujer con depresión mayor con rasgos psicóticos que solicita la interrupción del embarazo**  
*Benjamin D. Brody, M.D., et al.* **AUDIO** • **CLINICAL GUIDANCE**

### PERSPECTIVAS EN SALUD MENTAL GLOBAL

- 16 Familias iraquíes desplazadas en Kurdistán: Extraños en un país extraño**  
*Rami Bou Khalil, M.D., et al.*

### RESÚMENES Y RESEÑAS

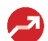

- 18 Uso indebido y abuso de opiáceos obtenidos por prescripción y su tratamiento en los Estados Unidos: Una actualización**  
*Kathleen T. Brady, M.D., Ph.D., et al.* **CME** • **AUDIO** • **CLINICAL GUIDANCE**
- 27 Encontrando la «lesión» psiquiátrica elusiva con la neuronatología del siglo 21: Una nota de advertencia**  
*Daniel R. Weinberger, M.D., Eugenia Radulescu, M.D.* **AUDIO**

## NUEVAS INVESTIGACIONES

### ARTÍCULOS

- 34 Asociación entre TDAH y obesidad: Un meta-análisis y una revisión sistemática**  
*Samuele Cortese, M.D., Ph.D., et al.* **EDITORIAL** • **CME** • **AUDIO**
- 44 Actividad microglial en personas con riesgo ultra alto de psicosis y en esquizofrenia: Un estudio de imágenes del cerebro con TEP [<sup>11</sup>C]PBR28 PET**  
*Peter S. Bloomfield, M.Sc., et al.* **EDITORIAL** • **VIDEO**
- 53 Respuesta diferencial a la risperidona en pacientes con esquizofrenia por genotipo *KCNH2* y estatus metabolizador de drogas.**  
*Juliane Heide, Ph.D., et al.* **EDITORIAL**
- 60 *Splicing* (corte y empalme) desregulado de *ErbB4* en esquizofrenia: Efectos selectivos en la expresión de la parvalbúmina**  
*Daniel W. Chung, M.S., et al.*

- 69** **Conectividad funcional estriatal de base como predictor de la respuesta al tratamiento con medicamentos antipsicóticos**  
*Deepak K. Sarpal, M.D., et al.* EDITORIAL • AUDIO
- 78** **Actividad de la amígdala durante la recuperación de la memoria autobiográfica en individuos deprimidos y vulnerables: Asociación con la severidad de los síntomas y la generalidad autobiográfica excesiva**  
*Kymerly D. Young, Ph.D., et al.* EDITORIAL • CME • AUDIO • VIDEO

## COMUNICADOS Y ACTUALIZACIONES

### CARTAS AL EDITOR

- 90** **Terapia de dignidad para el trastorno de abuso del alcohol**  
*Katherine E. Lubarsky, M.D., and Jonathan D. Avery, M.D.*

### RESEÑA BIBLIOGRÁFICA

- 91** **The Psychoanalytic Model of the Mind [El modelo psicoanalítico de la mente]**  
*Richard Summers, M.D.*
- 92** **Alien Landscapes? Interpreting Disordered Minds [¿Paisajes extraterrestres? Interpretando mentes trastornadas]**  
*Ira Steinman, M.D.*
- 93** **Hidden in Plain Sight: The Social Structure of Irrelevance [Escondido a simple vista: La estructura social de la irrelevancia]**  
*Tanya Marie Luhrmann, Ph.D.*

## OTROS TEMAS DE INTERÉS

- 95** **Educación Médica Continuada**

**Cubierta:** Un número considerable de investigaciones relacionan los procesos inflamatorios con varios aspectos de las enfermedades mentales, incluyendo el desarrollo de la psicosis. Bloomfield y sus colegas (p. 44) utilizaron una técnica nueva de imágenes del cerebro para evaluar la actividad microglial en sujetos sanos, sujetos con riesgo de psicosis y sujetos con esquizofrenia. Encontraron señales de actividad microglial elevada tanto en sujetos en riesgo como en sujetos con esquizofrenia, en relación a los sujetos sanos. Estos hallazgos podrían impulsar los esfuerzos para tratar o prevenir la psicosis centrándose en los procesos inflamatorios. [Image courtesy of Peter Bloomfield.]

Article content that addresses **Core Competencies**, defined by the Accreditation Council of Graduate Medical Education and the American Board of Medical Specialties, is indicated by the following symbols:

- |                                                                                                                            |                                                                                                                             |
|----------------------------------------------------------------------------------------------------------------------------|-----------------------------------------------------------------------------------------------------------------------------|
|  Professionalism                        |  Patient Care and Procedural Skills      |
|  Medical Knowledge                      |  Practice-Based Learning and Improvement |
|  Interpersonal and Communication Skills |  Systems-Based Practice.                 |

More information is available at [www.abms.org/maintenance\\_of\\_certification/MOC\\_competencies.aspx](http://www.abms.org/maintenance_of_certification/MOC_competencies.aspx)

### La Tabla de Contenidos y resúmenes de Este Número Está Disponible en Español

(This issue's Table of Contents and abstracts are available in Spanish)

Translation presented in collaboration with the Office of Global Health, Rutgers-Robert Wood Johnson Medical School

Support for this effort provided by ACTA Colombia.

#### Translation courtesy of

**Sergi Casals, M.A.**, Garuna, Medellín, Colombia ([www.garunaeditors.com](http://www.garunaeditors.com))

**Carlos Lopez Jaramillo, M.D.**, Universidad de Antioquia, Medellín, Colombia

**Javier I. Escobar, M.D., M.Sc.**, Rutgers-Robert Wood Johnson Medical School

- AUDIO** Highlighted in AJP Audio, a downloadable .mp3 file available at [ajp.psychiatryonline.org](http://ajp.psychiatryonline.org)
- CME** A course covering the content of this article is available online for paid subscribers to the AJP CME Course program
- EDITORIAL** Discussed in one of the issue's editorials
- GUÍAS CLÍNICAS** Clinical Guidance provided on the English table of contents
- VIDEO** Highlighted online by Deputy Editor Daniel S. Pine, M.D.

# Uso indebido y abuso de opiáceos obtenidos por prescripción y su tratamiento en los Estados Unidos: Una actualización

Kathleen T. Brady, M.D., Ph.D., Jenna L. McCauley, Ph.D., Sudie E. Back, Ph.D.

**Objetivo:** El abuso y la dependencia de opiáceos obtenidos por prescripción médica han aumentado rápidamente en los Estados Unidos en los últimos 20 años, dando como resultado altas tasas de muertes por sobredosis y un aumento drástico del número de personas que buscan tratamiento para la dependencia de opiáceos. Los autores revisan el alcance de la epidemia de abuso y sobredosis, las prácticas de prescripción y la evaluación, el tratamiento y la prevención del uso inadecuado y la dependencia de los opiáceos obtenidos por prescripción médica.

**Método:** Los autores brindan una visión general de la literatura desde el 2006 hasta el momento actual, con el doble objetivo de resaltar los avances en la prevención y el tratamiento y de identificar los aspectos científicos todavía sin resolver.

**Resultados:** Se han tomado varias iniciativas políticas y educativas a nivel de gobierno estatal y federal en los últimos 5 años para ayudar a los proveedores y consumidores, respectivamente, a recetar y consumir los opiáceos de manera más

responsable. Los informes iniciales sugieren que los niveles de desviación y abuso han empezado a estabilizarse, probablemente como resultado de dichas iniciativas. Si bien hay muchas investigaciones que sugieren que la sustitución de los opiáceos junto con intervenciones sociales son la mejor opción de tratamiento para la dependencia de la heroína, el número de investigaciones que se centran específicamente en el tratamiento de la dependencia de opiáceos es limitado. En particular, sigue sin explorarse el tratamiento del dolor crónico en individuos con uso de opiáceos obtenidos por prescripción.

**Conclusiones:** Mientras las iniciativas políticas y educativas parecen ser efectivas para disminuir el uso indebido y el abuso de los opiáceos obtenidos por prescripción, es fundamental y necesaria la investigación sobre el desarrollo y la evaluación de tratamientos específicos para la dependencia de opiáceos obtenidos por prescripción y sus comorbilidades comunes (p. ej. dolor crónico, depresión).

*(Am J Psychiatry 2016; 173:18–26)*

## RESÚMENES Y RESEÑAS

[Mechanisms of Psychiatric Illness]

# Encontrando la «lesión» psiquiátrica elusiva con la neuronatomía del siglo 21: Una nota de advertencia

Daniel R. Weinberger, M.D., Eugenia Radulescu, M.D.

El uso generalizado de la IRM ha conllevado una riqueza de hallazgos anatómicos estructurales y funcionales en pacientes con varios trastornos psiquiátricos que pueden contribuir a la comprensión de la biopatología. Sin embargo, informes técnicos recientes indican que los datos de la popular investigación con IRM—en particular de IRM estructural, IRM funcional en estado de reposo, e imágenes con tensor de difusión—son altamente sensibles a ciertos factores coexistentes (p. ej. efectos respiratorios y del movimiento de la cabeza) que pueden influir los resultados. Dado que estos y otros factores de confusión de los datos de IRM (p. ej. consumo de tabaco, peso corporal, variaciones metabólicas, comorbilidades médicas, drogas psicoactivas, consumo de al-

cohol, estado mental) tienden a variar sistemáticamente entre los grupos de pacientes y los grupos control, la evidencia que los hallazgos son significativos desde un punto de vista neurobiológico no es concluyente y puede representar aspectos o epifenómenos de valor incierto. Los autores advierten que aceptar de forma acrítica, de los estudios que van saliendo, hallazgos que pueden representar falacias de todo tipo conlleva el riesgo de dar información equivocada a médicos y pacientes sobre las anomalías biológicas que subyacen a las enfermedades psiquiátricas.

*(Am J Psychiatry 2016; 173:27–33)*

## Asociación entre TDAH y obesidad: Un meta-análisis y una revisión sistemática

Samuele Cortese, M.D., Ph.D., Carlos Renato Moreira-Maia, M.D., Ph.D., Diane St. Fleur, M.D., Carmen Morcillo-Peñalver, M.D., Luis Augusto Rohde, M.D., Ph.D., Stephen V. Faraone, Ph.D.

**Objetivo:** La impulsividad y la falta de atención relacionadas con el trastorno por déficit de atención e hiperactividad (TDAH) pueden aumentar la ingesta de alimentos y, por consiguiente, incrementar el aumento de peso. Sin embargo, los hallazgos sobre la asociación entre obesidad/sobrepeso y TDAH son mixtos. Los autores realizaron un meta-análisis para estimar esta asociación.

**Método:** Se hicieron búsquedas en un gran número de bases de datos hasta el 31 de agosto de 2014. También se obtuvieron estudios no publicados. La calidad de los estudios se evaluó con la Escala Newcastle-Ottawa. Se emplearon modelos de efectos aleatorios.

**Resultados:** Se conservaron 42 estudios que incluían un total de 728.136 individuos (48.161 sujetos con TDAH; 679.975 sujetos de comparación). Se encontró una asociación significativa entre obesidad y TDAH tanto para niños (*odds ratio* = 1,20, IC 95%=1,05–1,37) como para adultos (*odds ratio*=1,55, CI 95%=1,32–1,81). La prevalencia combinada de la obesidad aumentó un 70% en adultos con TDAH (28,2%, IC 95%=22,8–34,4) comparados con aquellos sin TDAH (16,4%,

IC 95%=13,4–19,9), y un 40% en niños con TDAH (10,3%, IC 95%=7,9–13,3) comparados con los niños sin TDAH (7,4%, IC 95%=5,4–10,1). La asociación significativa entre TDAH y obesidad permaneció cuando se consideraron solamente los estudios 1) que reportaban *odds ratios* ajustados debido a posibles factores de confusión; 2) que diagnosticaban TDAH por medio de una entrevista directa, y 3) que utilizaban altura y peso medidos directamente. El género, el sitio del estudio, el país del estudio y la calidad del estudio no moderaron la asociación entre obesidad y TDAH. El TDAH también estuvo asociado significativamente con el sobrepeso. Los individuos medicados para TDAH no tenían mayor riesgo de obesidad.

**Conclusiones:** Este estudio ofrece evidencia meta-analítica de una asociación significativa entre TDAH y obesidad/sobrepeso. Futuras investigaciones deberían centrarse en los mecanismos subyacentes y los efectos a largo plazo que los tratamientos para TDAH tienen sobre el peso en individuos que tienen TDAH y obesidad simultáneamente.

(*Am J Psychiatry* 2016; 173:34–43)

## Actividad microglial en personas con riesgo ultra alto de psicosis y en esquizofrenia: Un estudio de imágenes del cerebro con TEP [11C]PBR28

Peter S. Bloomfield, M.Sc., Sudhakar Selvaraj, M.D., Ph.D., Mattia Veronese, Ph.D., Gaia Rizzo, Ph.D., Alessandra Bertoldo, Ph.D., David R. Owen, M.D., Ph.D., Michael A.P. Bloomfield, M.D., Ilaria Bonoldi, M.D., Nicola Kalk, M.D., Federico Turkheimer, Ph.D., Philip McGuire, M.D., Ph.D., Vincenzo de Paola, Ph.D., Oliver D. Howes, M.D., Ph.D.

**Objetivo:** El objetivo de este estudio fue determinar si la actividad microglial, medida con imagenología con tomografías por emisión de positrones (PET) de la proteína de translocador, aumenta en personas no medicadas que presentan síntomas subclínicos, indicando que están en riesgo ultra alto de psicosis, y determinar si la actividad microglial es elevada en esquizofrenia después de controlar un polimorfismo genético específico de un translocador.

**Método:** Los autores utilizaron el radioligando de segunda generación [11C]PBR28 Y TEP para las imágenes de la actividad microglial en cerebros de participantes con riesgo ultra alto de psicosis. Se reclutó a los participantes en centros de intervención temprana. Los autores también tomaron imágenes de una cohorte de pacientes con esquizofrenia y sujetos de comparación. En total, 56 sujetos completaron el estudio. En el escrutinio, se genotipificaron los pacientes para dar razón del polimorfismo rs6971 en el gen que codifica la proteína del traslocador 18Kd. La medida de resultados primarios fue la tasa de fijación de [11C]PBR28 de la sustancia gris total, que representa la actividad microglial.

**Resultados:** La tasa de fijación de [11C]PBR28 en la sustancia gris se encontró elevada en participantes con riesgo ultra alto en relación a los respectivos sujetos de comparación (d de Cohen >1,2) y estuvo correlacionada positivamente con la severidad de los síntomas ( $r=0,730$ ). Los pacientes con esquizofrenia también exhibieron actividad microglial elevada con respecto a los sujetos de comparación (d de Cohen >1,7).

**Conclusiones:** La actividad microglial está elevada en pacientes con esquizofrenia y en personas con síntomas subclínicos con riesgo ultra alto de psicosis y está relacionada con la severidad de los síntomas de riesgo. Estos hallazgos sugieren que la neuroinflamación está ligada al riesgo de psicosis y a trastornos relacionados, igual que la expresión de síntomas subclínicos.

*(Am J Psychiatry 2016; 173:44–52)*

## Respuesta diferencial a la risperidona en pacientes con esquizofrenia por genotipo KCNH2 y estatus metabolizador de drogas

Juliane Heide, Ph.D., Fengyu Zhang, Ph.D., Kristin L. Bigos, Ph.D., Stefan A. Mann, Ph.D., Vaughan J. Carr, M.B.B.S., Cynthia Shannon Weickert, Ph.D., Melissa J. Green, Ph.D., Daniel R. Weinberger, M.D., Jamie I. Vandenberg, M.B.B.S., Ph.D.

**Objetivo:** El objetivo de los medicamentos antipsicóticos son los receptores de dopamina y serotonina, y los canales de potasio Kv11.1 codificados por el gen KCNH2. Las respuestas variables de los pacientes y un número considerable de efectos secundarios, sin embargo, limitan su eficacia. El estatus metabolizador lento y las variantes del gen KCNH2 asociadas con la expresión aumentada de Kv11.1-3.1, una isoforma de Kv11.1 producida por "splicing" (corte y empalme del gen) alternativo, están correlacionadas con respuestas mejoradas a las medicaciones antipsicóticas. En este estudio, los autores prueban la hipótesis que estos efectos pueden estar influenciados por la fijación diferencial de los medicamentos a isoformas del canal Kv11.1.

**Método:** Se probó el bloqueo de medicamentos de isoformas del canal Kv11.1 en ensayos de electrofisiología celular. Los efectos del metabolismo del medicamento y de los genotipos de KCNH2 en las respuestas clínicas se evaluaron en pacientes que participaban en los Ensayos Clínicos Multicéntricos de Efectividad de la Intervención con Antipsicóticos (CATIE, *Clinical Antipsychotic Trials of Intervention Effectiveness*).

**Resultados:** La risperidona causó mayor bloqueo in vitro de

la isoforma Kv11.1 producida por splicing alternativo, que de los canales Kv11.1-1A completos, mientras que su metabolito paliperidona y otros antipsicóticos atípicos tiene potencias similares para las dos isoformas. En el estudio CATIE (N=362), los pacientes con genotipos asociados con una expresión aumentada de Kv11.1-3.1 (N=52) mostraron una mejor respuesta al tratamiento con risperidona comparada con otros medicamentos, pero dicha asociación dependía del estatus del metabolismo. Los pacientes con genotipos de riesgo de KCNH2 y estatus metabolizador lento (aproximadamente 7% de los pacientes) mostraron una marcada mejoría de los síntomas cuando recibían tratamiento con risperidona comparados con los pacientes con estatus metabolizador rápido o sin los genotipos de riesgo de KCNH2.

**Conclusiones:** Estos datos apoyan la hipótesis que los canales Kv11.1 juegan un papel en la acción terapéutica de los medicamentos antipsicóticos, particularmente de la risperidona, y resaltan la promesa de optimizar la respuesta con terapia guiada por medio de genotipos para los pacientes con esquizofrenia.

(*Am J Psychiatry* 2016; 173:53–59)

## Splicing (corte y empalme) desregulado de ErbB4 en esquizofrenia: Efectos selectivos en la expresión de la parvalbúmina

Daniel W. Chung, M.S., David W. Volk, M.D., Ph.D., Dominique Arion, Ph.D., Yun Zhang, M.A., Allan R. Sampson, Ph.D., David A. Lewis, M.D.

**Objetivo:** El splicing alternativo de los transcritos de ErbB4 está desregulada en la corteza prefrontal dorsolateral en esquizofrenia. La ErbB4 regula la actividad de las interneuronas parvalbúmina, de modo que el splicing desregulado de ErbB4 podría contribuir a una menor actividad de las interneuronas parvalbúmina y por consiguiente a niveles de parvalbúmina inferiores en la esquizofrenia. Sin embargo, la ErbB4 también está presente en las interneuronas calretinina, que no se ven afectadas en la esquizofrenia. La hipótesis de los autores, por consiguiente, fue que el splicing desregulado de ErbB4 ocurre de manera selectiva en las interneuronas parvalbúmina y está asociado con niveles inferiores de parvalbúmina en la esquizofrenia.

**Método:** Se microdisecionaron muestras de tejidos enriquecidos con interneuronas calretinina y parvalbúmina de las capas 2 y 4 de la corteza prefrontal dorsolateral respectivamente, de igual número de sujetos con esquizofrenia y de comparación. En cada capa se cuantificaron, por medio de la reacción en cadena de la polimerasa (PCR) cuantitativa, los niveles de transcritos de pan-ERbB4, cuatro variantes del splicing de ErbB4 (JM-a, JM-b, CYT-1, CYT-2), la parvalbúmina y la calretinina. Los niveles de transcritos para el transcrito asociado con el infarto de miocardio (MIAT), que regula el splicing de ErbB4, se cuantificaron en la sustancia

gris por medio de la reacción en cadena de la polimerasa (PCR) cuantitativa y en la parvalbúmina por medio de microarrays.

**Resultados:** Los ARNm de la calretinina y la parvalbúmina fueron expresados primordialmente en las capas 2 y 4 respectivamente. En sujetos con esquizofrenia, se detectaron selectivamente en la capa 4 niveles inferiores de parvalbúmina, niveles más altos de CYT-1 y JM-a, y niveles más bajos de CYT-2 y JM-b. En la capa 4, la proporción JM-a/JM-b estuvo correlacionada inversamente con los niveles de parvalbúmina en los sujetos con esquizofrenia. Los niveles de MIAT fueron primordialmente más altos en las interneuronas parvalbúmina en los sujetos con esquizofrenia.

**Conclusiones:** Estos hallazgos sugieren que la expresión elevada de MIAT altera el splicing de ErbB4 selectivamente en las interneuronas parvalbúmina en esquizofrenia. El splicing desregulado de ErbB4 puede contribuir a una inferior actividad de las interneuronas parvalbúmina y a una regulación decreciente, dependiente de la actividad, de la expresión de la parvalbúmina.

*(Am J Psychiatry 2016; 173:60–68)*



# Conectividad funcional estriatal de base como predictor de la respuesta al tratamiento con medicamentos antipsicóticos

Deepak K. Sarpal, M.D., Miklos Argyelan, M.D., Delbert G. Robinson, M.D., Philip R. Szeszko, Ph.D., Katherine H. Karlsgodt, Ph.D., Majnu John, Ph.D., Noah Weissman, B.A., Juan A. Gallego, M.D, M.S., John M. Kane, M.D., Todd Lencz, Ph.D., Anil K. Malhotra, M.D.

**Objetivo:** La respuesta clínica al tratamiento con medicamentos antipsicóticos es altamente variable, y faltan biomarcadores de pronóstico. Los autores demostraron recientemente que el tratamiento exitoso con antipsicóticos altera la conectividad funcional en estado de reposo del estriado. El objetivo del presente estudio fue explorar si los patrones de conectividad estriatal intrínseca ofrecen información de pronóstico y pueden servir como un biomarcador potencial de la respuesta al tratamiento con medicamentos antipsicóticos.

**Método:** Los autores utilizaron IRM funcional (IRMf) para desarrollar un índice pronóstico en una cohorte de descubrimiento de 41 pacientes con primer episodio de esquizofrenia, y luego probaron dicho índice en una cohorte independiente de 40 pacientes crónicos recientemente hospitalizados con psicosis aguda. En la cohorte de descubrimiento, se hizo IRMf en estado de reposo a los pacientes al inicio de un tratamiento controlado aleatorizado con un antipsicótico de segunda generación. Se generaron mapas de conectividad funcional del cerebro completo para cada sujeto a partir de las regiones estriatales con semilla. Se calculó una medida estricta de la respuesta clínica, que requería mejoría constante en dos visitas de estudio consecutivas. Se registró la respuesta clínica en un análisis de supervivencia, y

se aplicó la regresión de Cox a los datos de conectividad funcional. Se creó un índice de conectividad estriatal que comprendía conexiones funcionales del estriado que predecían la respuesta al tratamiento. Dicho índice de conectividad estriatal se probó en una cohorte generalizable, de pacientes con trastornos psicóticos que fueron hospitalizados por un episodio psicótico agudo.

**Resultados:** Un total de 91 regiones conectadas funcionalmente con el estriado ofrecieron información pronóstica significativa. La conectividad en estas regiones fue utilizada para crear un índice de conectividad estriatal base que predecía la respuesta al tratamiento con antipsicóticos con alta sensibilidad y especificidad tanto en la cohorte de descubrimiento como en la generalizable.

**Conclusiones:** Estos resultados ofrecen evidencia que las diferencias individuales en la conectividad funcional estriatal predicen la respuesta al tratamiento con medicamentos antipsicóticos en pacientes con psicosis aguda. Con desarrollos ulteriores, esto tiene el potencial de servir como biomarcador de pronóstico con utilidad clínica y reducir la carga general asociada a las enfermedades psicóticas.

(*Am J Psychiatry* 2016; 173:69–77)

## Actividad de la amígdala durante la recuperación de la memoria autobiográfica en individuos deprimidos y vulnerables: Asociación con la severidad de los síntomas y la generalidad autobiográfica excesiva

Kymberly D. Young, Ph.D., Greg J. Siegle, Ph.D., Jerzy Bodurka, Ph.D., Wayne C. Drevets, M.D.

**Objetivo:** En individuos sanos, la recuperación de la memoria autobiográfica está sesgada hacia los eventos positivos y se aleja de los negativos, mientras que lo contrario ocurre en individuos deprimidos. Este estudio examinó la actividad de la amígdala durante la recuperación de la memoria autobiográfica como un mecanismo putativo subyacente a la recuperación de memoria sesgada y a los síntomas depresivos en adultos actualmente deprimidos y en dos poblaciones vulnerables: en individuos remitidos de depresión y, por otro lado, en individuos sanos con alto riesgo familiar de desarrollar depresión. La identificación de dichos factores de vulnerabilidad posibilitaría aplicar estrategias de interceptación para prevenir el inicio de la depresión.

**Método:** Se efectuó IRM funcional en 60 sujetos control, 45 individuos con depresión no medicados, 25 individuos deprimidos remitidos no medicados y 30 individuos con riesgo familiar alto de desarrollar depresión, mientras recuperaban recuerdos autobiográficos en respuesta a palabras clave con una carga emocional. Se examinó la reactividad de la amígdala y la conectividad con regiones de la amígdala definidas anatómicamente.

**Resultados:** Durante la recuperación positiva, los participantes deprimidos exhibieron actividad significativamente reducida de la amígdala izquierda y conectividad reducida

con regiones de la red neuronal sobresaliente (*salient*) en comparación con los otros grupos. Durante la recuperación negativa, los sujetos control tuvieron actividad significativamente disminuida de la amígdala izquierda en comparación con los otros grupos, mientras que los participantes deprimidos exhibieron mayor conectividad de la amígdala con la red neuronal sobresaliente. En los participantes deprimidos, la actividad de la amígdala izquierda estuvo correlacionada significativamente con la severidad de la depresión (valores  $r > -0,38$ ) y con el porcentaje de los recuerdos positivos recuperados (valores  $r > 0,59$ ).

**Conclusiones:** Los resultados sugieren que la hiperactividad de la amígdala izquierda durante la recuperación autobiográfica negativa es un marcador, similar a un rasgo, de la depresión, ya que ambos grupos vulnerables mostraron actividad similar a la del grupo deprimido, mientras que la hipoactividad de la amígdala durante la recuperación autobiográfica positiva es un marcador de estado de depresión que se manifiesta en la enfermedad activa. Los tratamientos para la hipoactividad de la amígdala y atenuación de la red sobresaliente durante la recuperación autobiográfica positiva podrían ejercer efectos antidepresivos.

(*Am J Psychiatry* 2016; 173:78–89)
