JANUARY 2016 | VOLUME 173 | NUMBER 1

# The American Journal of Psychiatry

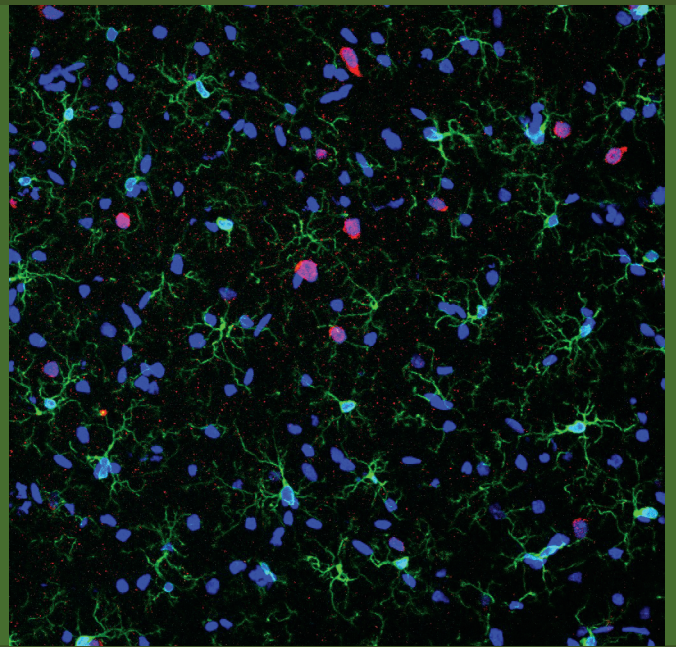

Microglial Activity in People at Ultra High Risk  
of Psychosis and in Schizophrenia

Prescription Opioid Misuse, Abuse, and  
Treatment in the United States

Finding the Elusive Psychiatric "Lesion" With  
21st-Century Neuroanatomy: A Note of Caution

Association Between ADHD and Obesity:  
A Systematic Review and Meta-Analysis

AMERICAN  
PSYCHIATRIC  
ASSOCIATION

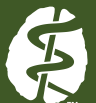

[ajp.psychiatryonline.org](http://ajp.psychiatryonline.org)
